# Supplementary material for: Photo-assisted (de)lithiation to enhance photoelectrochemical storage in quasi-solid-state Li-ion batteries
Source: Royal Society of Chemistry journal article supplement (doi:10.1039/d4su00494a), 2024-01-01
Supplement: d4su00494a1.pdf [file d4su00494a1.pdf]

## Supplementary information

Photo-assisted (de)lithiation to enhance the photoelectrochemical storage of the  
quasi-solid-state Li-ion battery

Xin Mi<sup>1,2</sup>, Jun Pan<sup>1</sup>, Menglin Duan<sup>1,2</sup>, Fuqiang Huang<sup>1,3\*</sup>, Peng Qin<sup>1,2\*</sup>

<sup>1</sup> State Key Laboratory of High-Performance Ceramics and Superfine Microstructure, Shanghai Institute of Ceramics, Chinese Academy of Science, Shanghai 200050, China.

<sup>2</sup> Center of Materials Science and Optoelectronics Engineering, University of Chinese Academy of Science, Beijing 100049, China.

<sup>3</sup> State Key Lab of Metal Matrix Composites, School of Materials Science and Engineering, Shanghai Jiao Tong University, Shanghai 200240, China

Correspondence and requests for materials should be addressed to P.Q. and F.H. (email: [qinpeng@mail.sic.ac.cn](mailto:qinpeng@mail.sic.ac.cn); [huangfq@sjtu.edu.cn](mailto:huangfq@sjtu.edu.cn)).

## Supplementary Figures

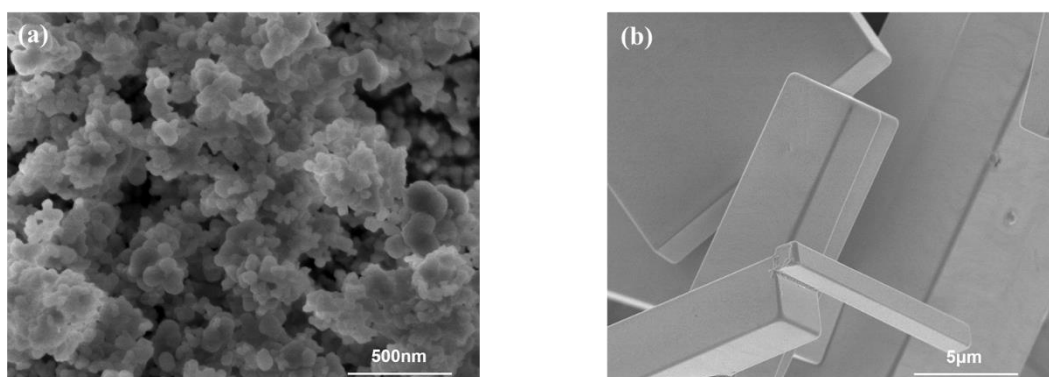

Fig S1. SEM image of PbPA (a) and CsPbBr<sub>3</sub> (b).

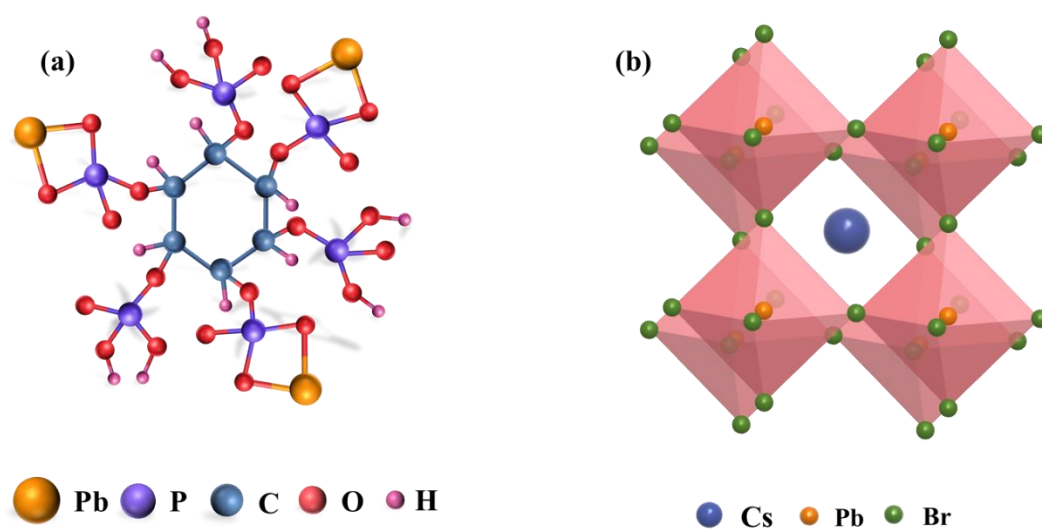

Fig S2. Schematic diagram of molecular structure of PbPA and CsPbBr<sub>3</sub>.

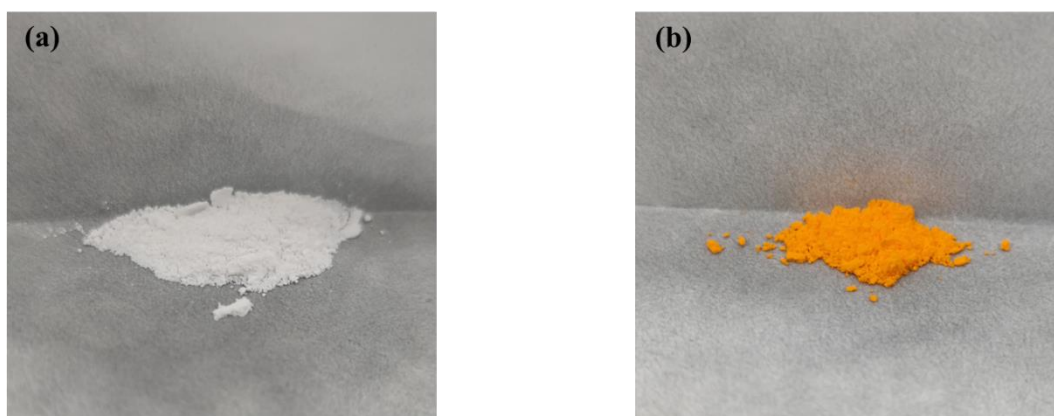

Fig S3. Optic image of PbPA (a) and CsPbBr<sub>3</sub> (b).

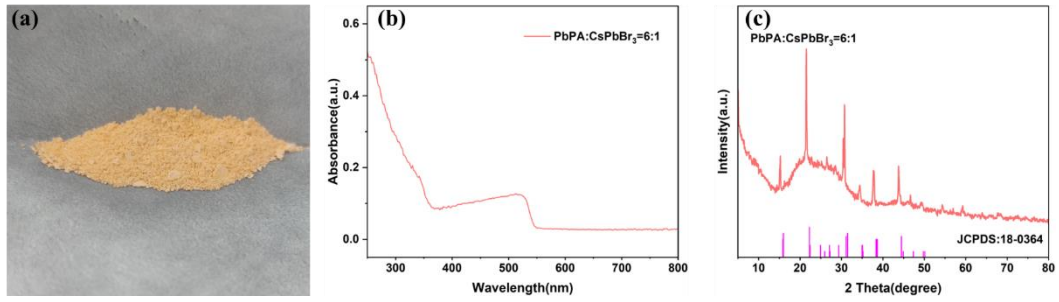

Fig S4. (a) Optic image. (b) UV-Vis absorption spectra. (c) XRD patterns of PbPA: CsPbBr<sub>3</sub> = 6:1.

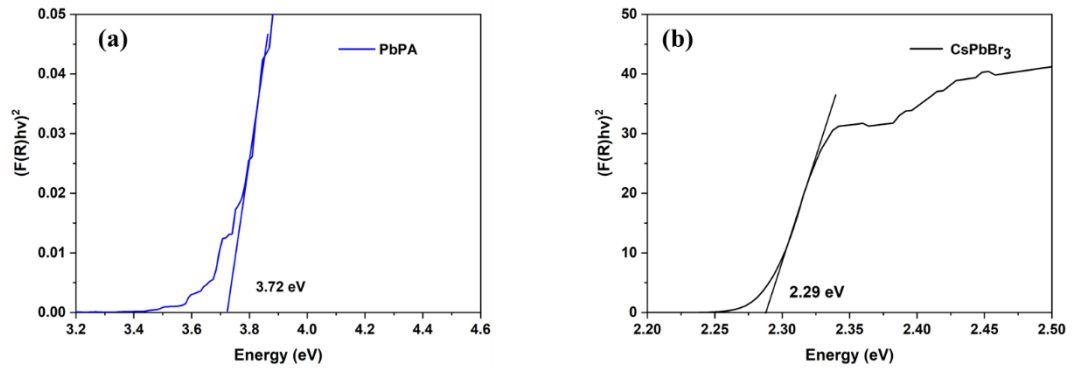

Fig S5. Tauc plot of of PbPA (a) and CsPbBr<sub>3</sub> (b).

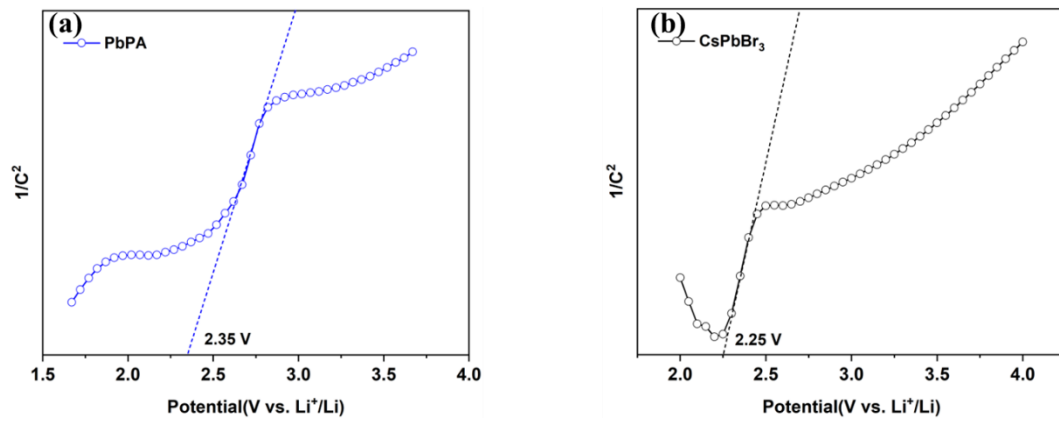

Fig S6. Mott-Schottky plots of PbPA (a) and CsPbBr<sub>3</sub> (b).

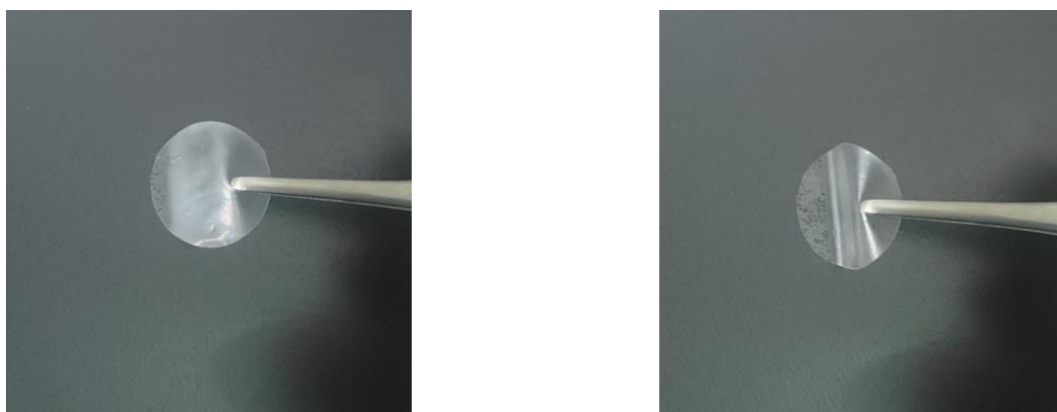

Fig S7. Optic image of quasi-solid-state gel polymer electrolyte.

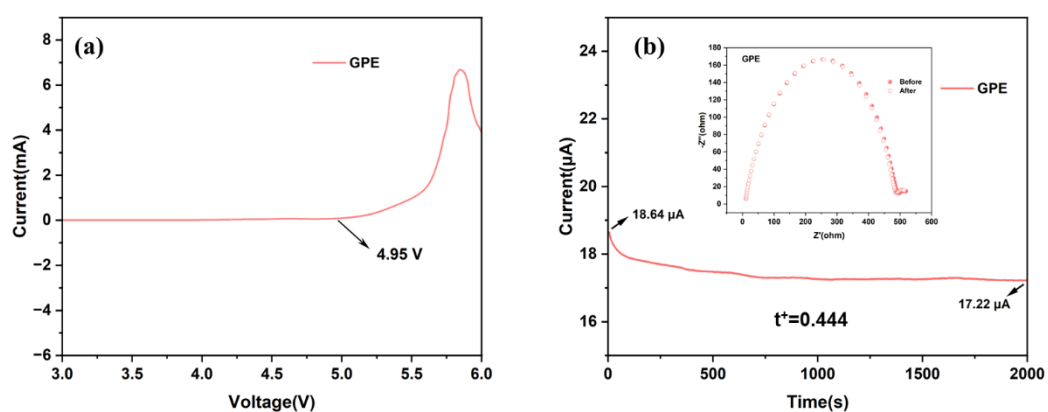

Fig S8. Electrochemical performance of quasi-solid-state gel polymer electrolyte.

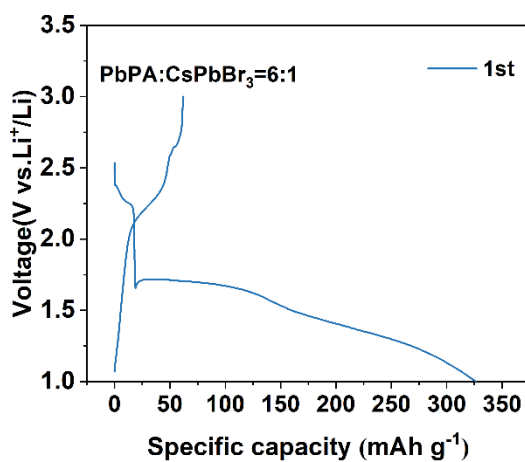

Fig S9. Charge/discharge profiles of the PbPA:CsPbBr<sub>3</sub>=6:1 battery at first cycle.

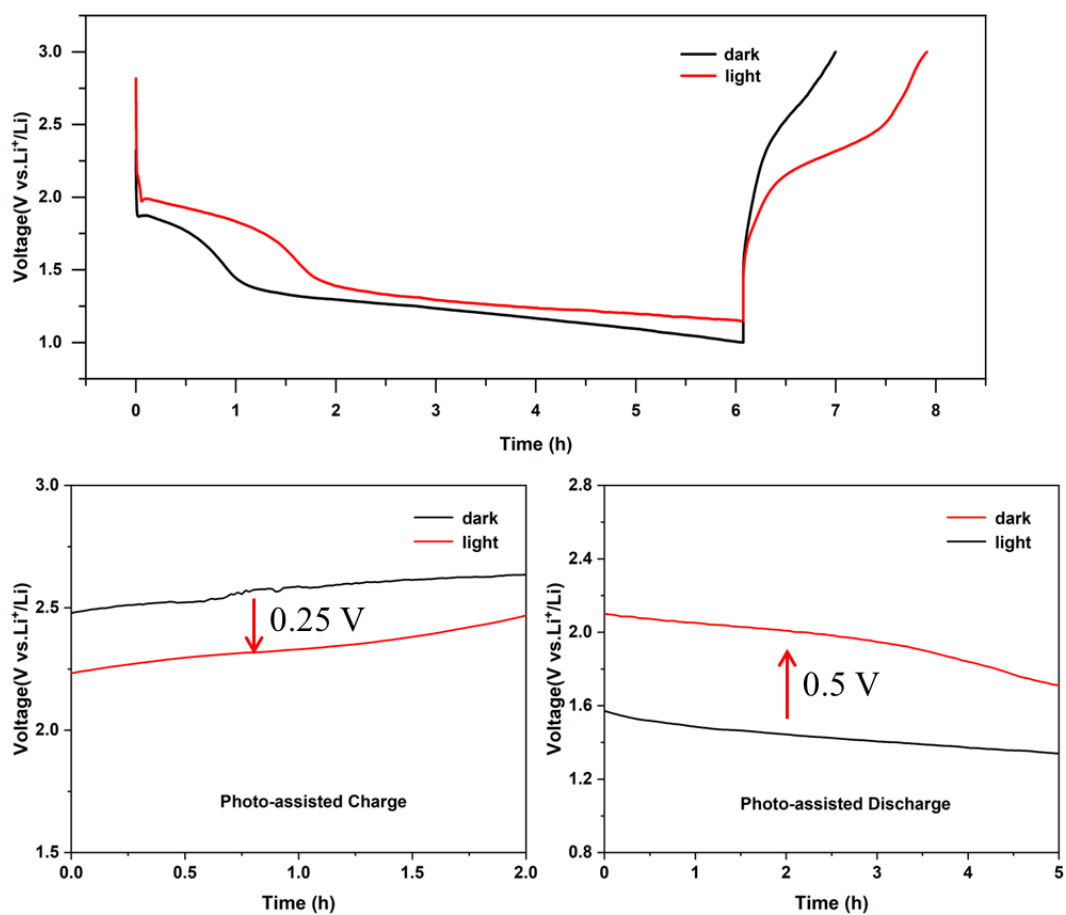

Fig S10. Photo assisted performance of PbPA: CsPbBr<sub>3</sub> = 6:1 at 0.08 C.

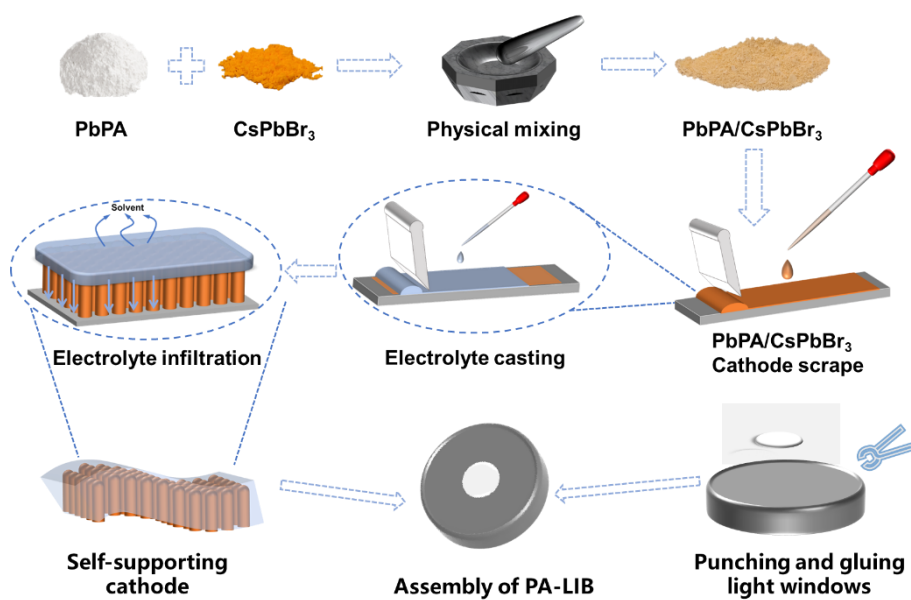

Fig S11. Graphic illumination of the preparation process of PA-LIB.

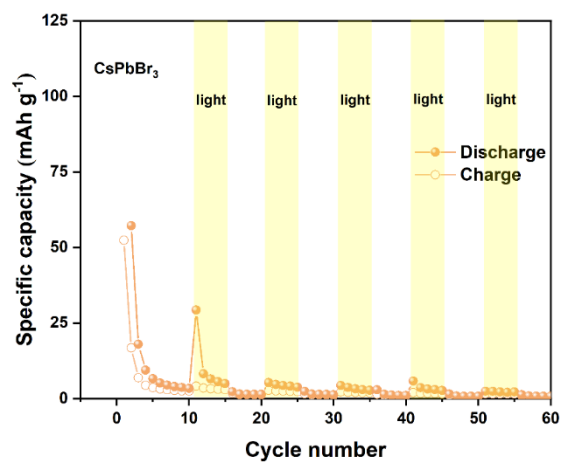

Fig S12. Photo-electrochemical performance of the CsPbBr<sub>3</sub> PA-LIB at 0.2C.
